# Supplementary material for: Exploring Unmet Needs and Family Planning Among Preeclampsia Survivors: A Qualitative Study
Source: Research Square preprint supplement (doi:10.21203/rs.3.rs-8022149/v1), 2025-12-11
Supplement: Supplementary file 2 [file a440979e4d5601ecef2e4526.docx]

**SETUP**

- **Our discussion will be about 60-90 minutes.**
- **Introduction and qualifications**
- **E-Consent: We will be recording audio and video for documentation purposes via Zoom + confidential + de-identified. If at all possible, please enable your camera to facilitate interaction between participants.**
- We may interrupt you to be mindful of your time and to get to all of our questions we would appreciate your opinions on.
- My colleagues are here as well + may jump in or have some follow-up questions for you in the last 15 minutes of our discussion.
- **There are no right / wrong answers; we just want to get your perspective. Assume I’m naïve!**
- **How data used: We will talk to approximately 15-20 others + record, accuracy, share w/team + importance of contribution + compensation**

Positionality: Lead/co-lead + pronouns + positionality / privilege / social positions

- Ask Everyone to change name to favorite color if they have not already done so.
- **Ice breaker – say name/color choice and tell us your most proud moment in the last year.**

GUIDING QUESTION

- What is the decision-making process survivors of preeclampsia undergo when deciding whether to have a subsequent pregnancy after PE?

PURPOSE / INTENT

- To determine factors that women consider when deciding whether to have a subsequent pregnancy following preeclampsia.

RESEARCH QUESTION

- We hypothesize that there will be factors that distinguish between survivors who have and have not decided to have a subsequent pregnancy.

| LEVEL OF INFLUENCE | FACTORS / CONTEXT | INTERVIEW QUESTIONS |
| --- | --- | --- |
| Individual | Access  Insurance coverage,  Healthy literacy,  Educational level,  Socioeconomic status,  Income  Agency + Advocacy | How did you learn that you had preeclampsia (PE)?   - Perception of severity / responses (e.g., change in health status, lifestyle, diet) - Causes / contributions (increase / decrease risk)   What info did you wish you had? What’s missing?   - Are there resources you wished you had access to regarding PE? - Do you ever feel like some resources aren’t for you? (Probe: race/ethnicity, language, SES) - Barriers to these resources? (income, insurance, locating resources) - What support would you like to see around PE? |
| Interpersonal | Reasons for wanting future pregnancy,  Beliefs, coping mechanisms  PE visibility, acceptance  PE support system  Family, Parents  Friends, Peers  Teachers, Educators, Supporters | Who do you talk to about your PE, if anyone? (Probe: nurse, social worker, health care provider; family / partner / friends, OB-GYN)   - What kind of feedback did you receive?   What have your discussions around family look like?   - What’s changed since learning about PE? (Probe: change family size, adoption and foster) - Has having PE altered/reduced the number of children you plan to have? (Probe: Next steps for family?)   What led you to want to have another child?  OR  What factors led you to decide NOT to have another child?   - What do you worry about? (Probe: changes to plan after prior PE preg, factors to consider now; short / long term conseq, family / partner worry, your health v. baby health) - What do you worry about if you should develop PE in a subsequent pregnancy? (Probe: worse / best outcome)   How is PE understood / viewed / supported by people supporting you with the pregnancy? (family, friends, partner/spouse) |
| Community | Care access / quality / type  Options  Provider preferences  Availability, access  Generalized support  PE Info during pregnancy / postpartum  Resources at prenatal care site, elsewhere  PE visibility/ acceptance in community | - Where do you get health info about PE? - What was access to healthcare like during your pregnancy?   What was the care team like? (different roles – OBGYN, social worker, nurse, mental health provider, community leader, etc.)   - Fave / least fave care team member - Did your care team look like you? (probe: welcoming, affirming space vs. medical mistrust, address historical trauma, assumptions, treated differently b/c of who you are) - How did you feel about the quality of services provided by X?   - What was lacking / helpful? (how competent/ complete)   - What services / resources / info did they have about PE? (probe: support groups, competent education, etc.)   - What resources / support would’ve you liked to have had?   - Could design your own pregnancy experience for yourself or a girlfriend with PE, what would you want to see? What would you want to be different? (probe: prenatal, postpartum) |
| Societal | PE prenatal care guidelines  Discrimination and stigma  Social norms | - Walk me through: living with PE? (Probe: what’s changed, what’s scary—seriousness of it, life-threatening) - What’s helped to deal with PE? (Probe: preventive tx, control, coping) - If you were X [white, different health system, insurance...immigration status, etc.], do you feel your experience with PE and provider / health system would have been different? - What do you wish you could tell your provider about people who have PE and want to have another baby? - Where do you get info about PE x pregnancy? (social media, friends, online sources—have them name it) - What sources do you trust to receive health information about PE? - How common or uncommon do you feel PE is (among their friends / peers)? |
